# Supplementary material for: The Emergence of Alternative 3′ and 5′ Splice Site Exons from Constitutive Exons
Source: PubMed Central journal article supplement (PMC1876488; doi:10.1371/journal.pcbi.0030095), 2007-05-25
Supplement: pcbi.0030095.sg004.pdf [file pcbi.0030095.sg004.pdf]

**A****upstream intron**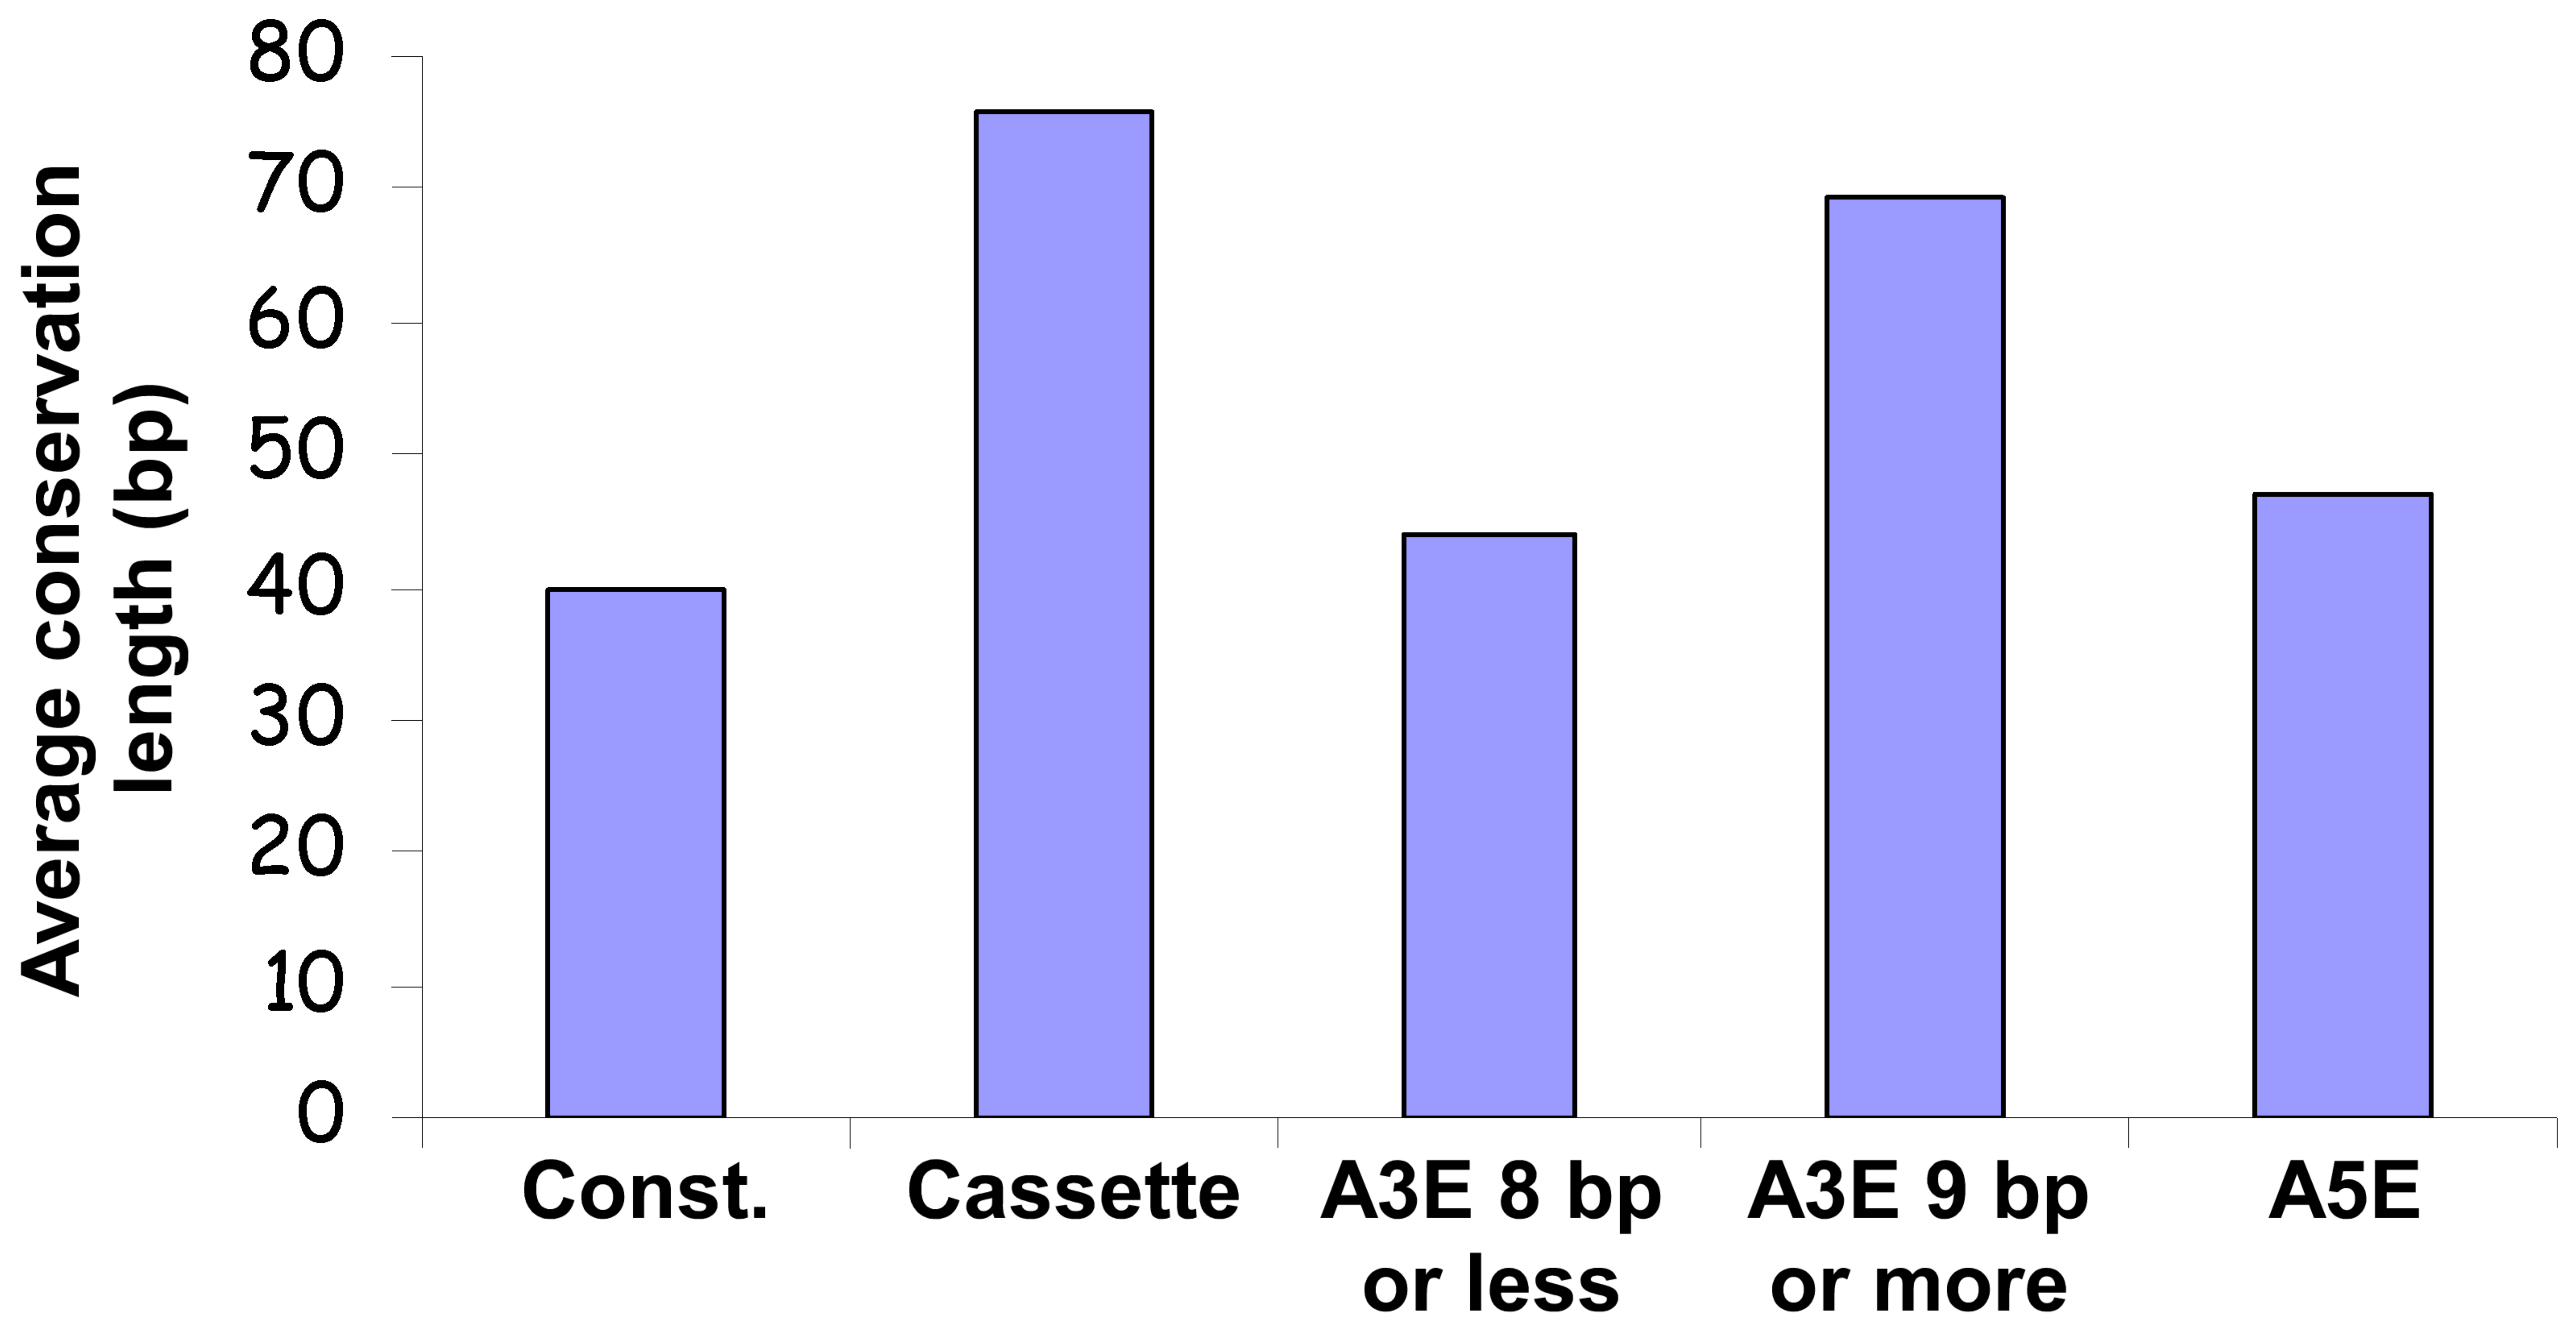**B****downstream intron**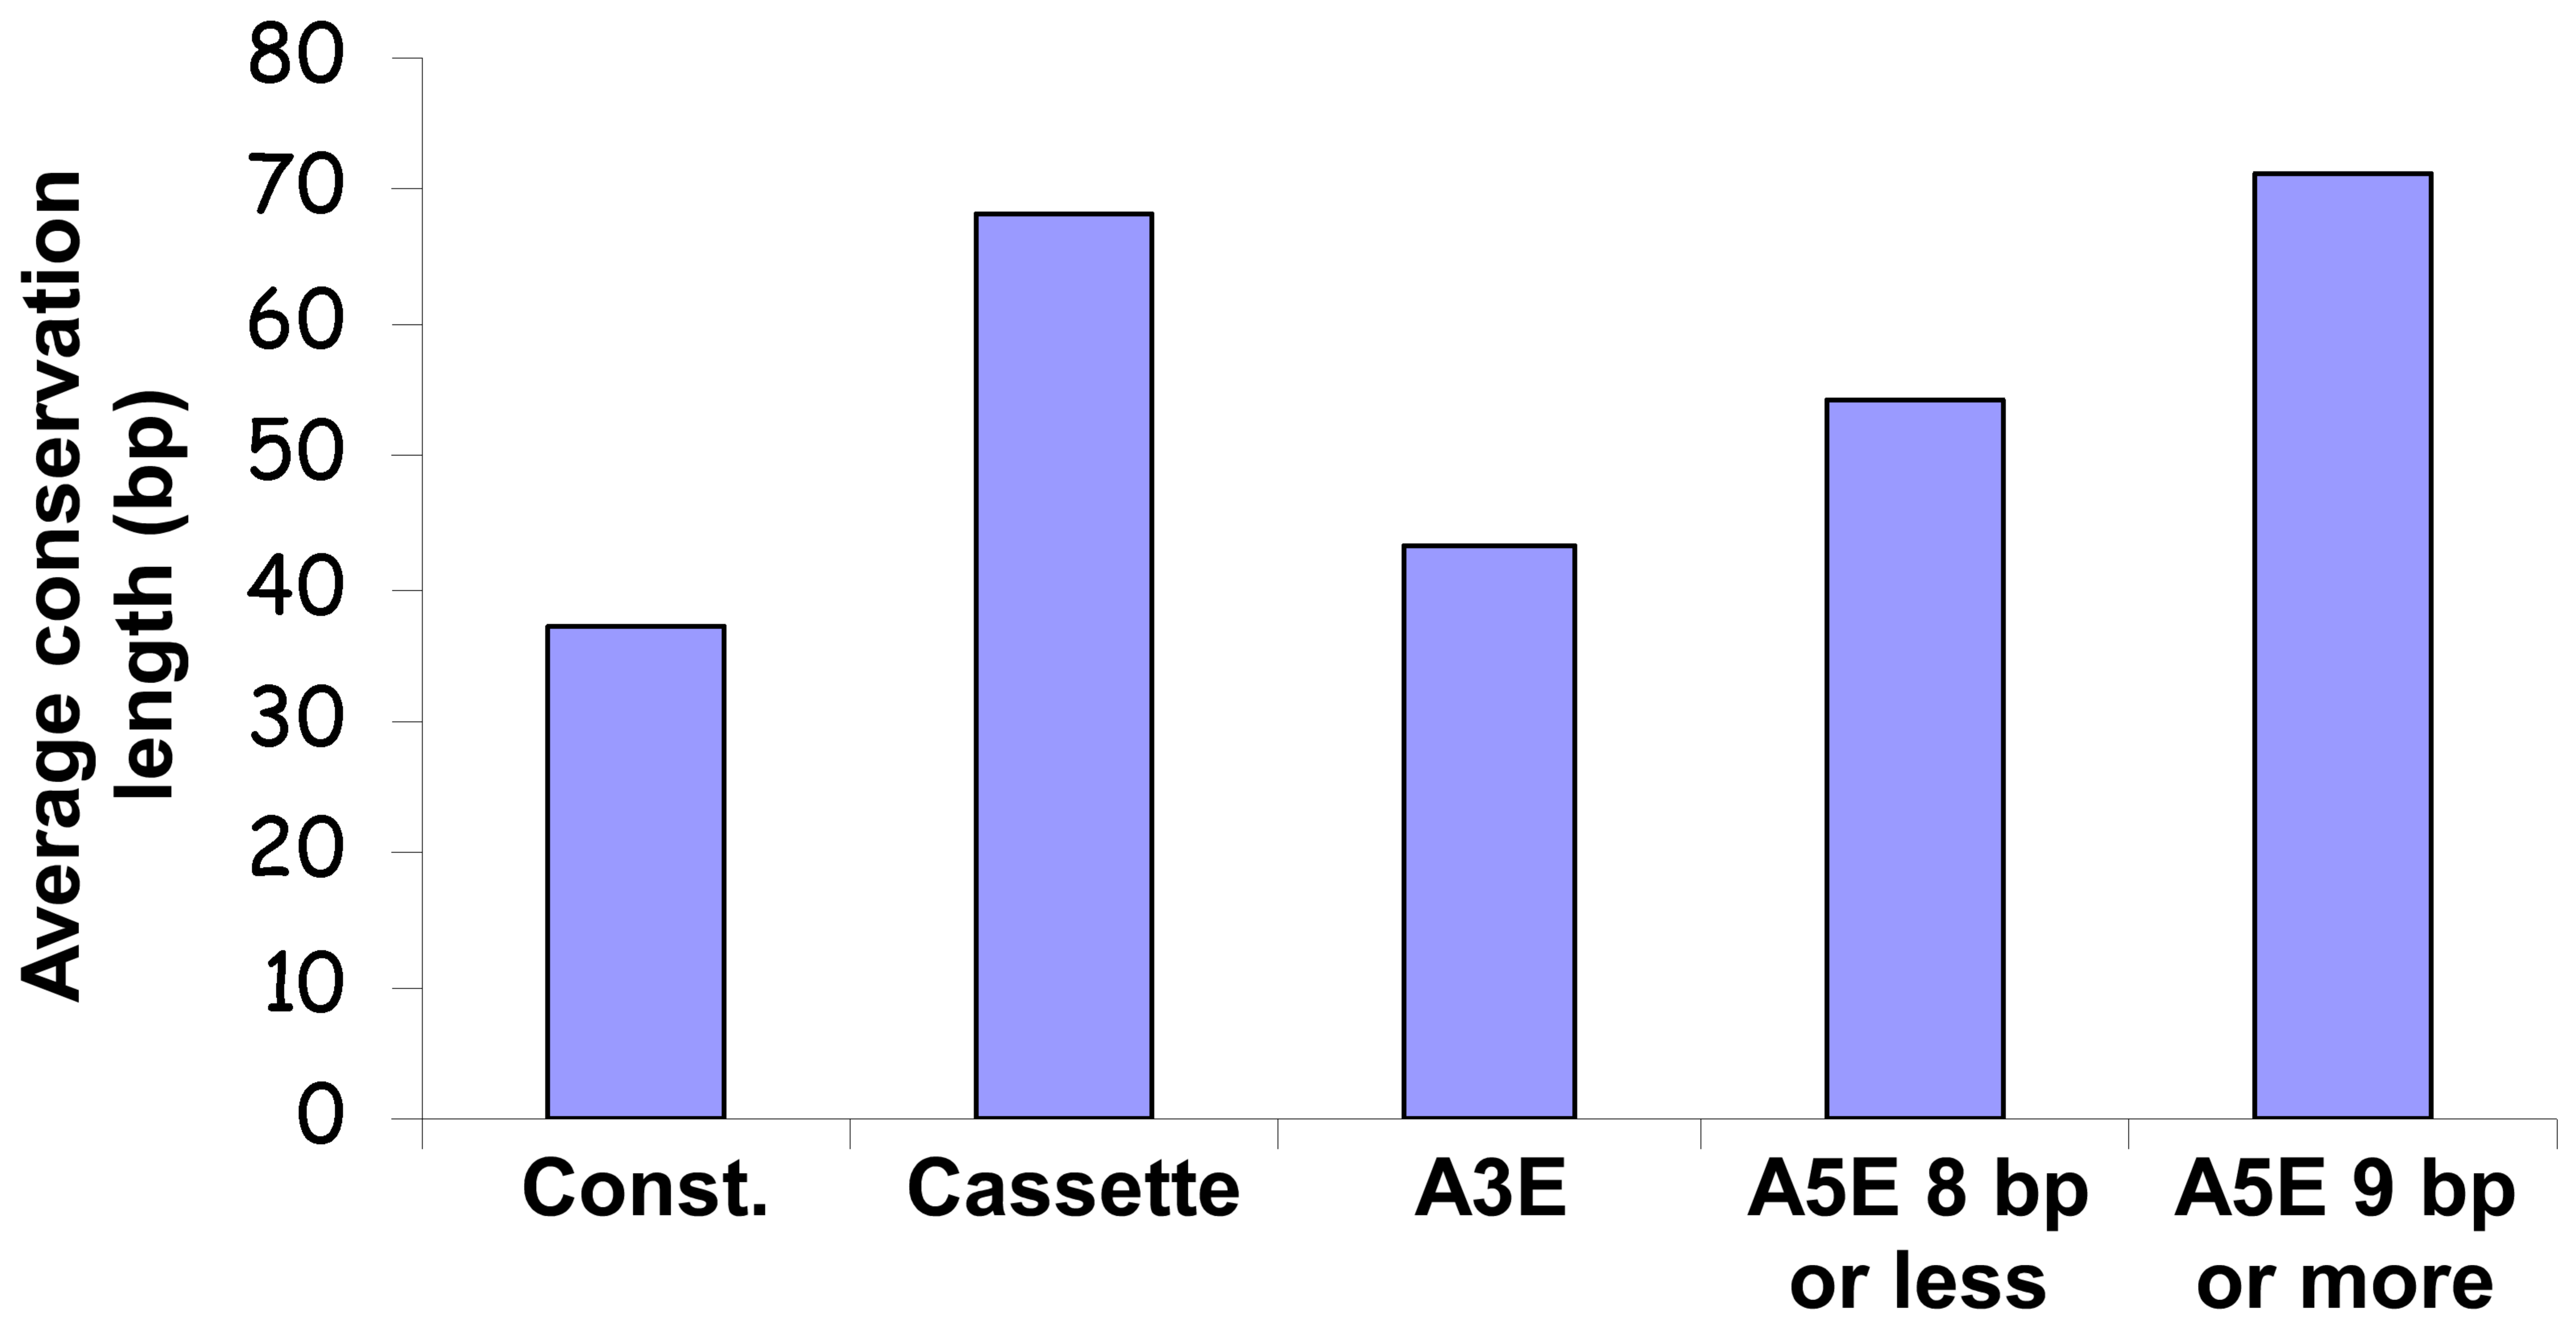**Figure S4**
